# Supplementary material for: Classifying Included and Excluded Exons in Exon Skipping Event Using Histone Modifications
Source: Front Genet. 2018 Oct 1;9:433. doi: 10.3389/fgene.2018.00433 (PMC6174203; doi:10.3389/fgene.2018.00433)
Supplement: Supplementary file 1 [file Table_1.DOCX]

***Supplementary Material***

**Classifying included and excluded exons in exon skipping event using histone modifications**

**Wei Chen1,2*, Pengmian Feng3, Hui Ding4, Hao Lin4***

1. Center for Genomics and Computational Biology, School of Life Science, North China University of Science and Technology, Tangshan, Tangshan 063000, China;
2. Innovative Institute of Chinese Medicine and Pharmacy, Chengdu University of Traditional Chinese Medicine, Chengdu 611730, China;
3. School of Public Health, North China University of Science and Technology, Tangshan, 063000, China;
4. Key Laboratory for Neuro-Information of Ministry of Education, Center of Bioinformatics and Center for Information in Biomedicine, School of Life Science and Technology, University of Electronic Science and Technology of China, Chengdu 610054, China;

**Supplementary Table S1.** 38 kinds of histone modifications and their corresponding vector elements in Eq. 2 of the main text.

| Feature | Element | Feature | Element | Feature | Element |
| --- | --- | --- | --- | --- | --- |
| H3K27me3 | Φ1 | H3K79me1_succ | Φ39 | H2AK9ac_prec | Φ77 |
| H3K27me3_prec | Φ2 | H3K9me2 | Φ40 | H2AK9ac_succ | Φ78 |
| H3K27me3_succ | Φ3 | H3K9me2_prec | Φ41 | H2BK5ac | Φ79 |
| H3K4me2 | Φ4 | H3K9me2_succ | Φ42 | H2BK5ac_prec | Φ80 |
| H3K4me2_prec | Φ5 | H4K20me1 | Φ43 | H2BK5ac_succ | Φ81 |
| H3K4me2_succ | Φ6 | H4K20me1_prec | Φ44 | H3K27ac | Φ82 |
| H3K79me3 | Φ7 | H4K20me1_succ | Φ45 | H3K27ac_prec | Φ83 |
| H3K79me3_prec | Φ8 | H3K27me2 | Φ46 | H3K27ac_succ | Φ84 |
| H3K79me3_succ | Φ9 | H3K27me2_prec | Φ47 | H4K12ac | Φ85 |
| H3R2me1 | Φ10 | H3K27me2_succ | Φ48 | H4K12ac_prec | Φ86 |
| H3R2me1_prec | Φ11 | H3K4me1 | Φ49 | H4K12ac_succ | Φ87 |
| H3R2me1_succ | Φ12 | H3K4me1_prec | Φ50 | H4K91ac | Φ88 |
| H4R3me2 | Φ13 | H3K4me1_succ | Φ51 | H4K91ac_prec | Φ89 |
| H4R3me2_prec | Φ14 | H3K79me2 | Φ52 | H4K91ac_succ | Φ90 |
| H4R3me2_succ | Φ15 | H3K79me2_prec | Φ53 | H2BK120ac | Φ91 |
| H2BK5me1 | Φ16 | H3K79me2_succ | Φ54 | H2BK120ac_prec | Φ92 |
| H2BK5me1_prec | Φ17 | H3K9me3 | Φ55 | H2BK120ac_succ | Φ93 |
| H2BK5me1_succ | Φ18 | H3K9me3_prec | Φ56 | H3K14ac | Φ94 |
| H3K36me1 | Φ19 | H3K9me3_succ | Φ57 | H3K14ac_prec | Φ95 |
| H3K36me1_prec | Φ20 | H4K20me3 | Φ58 | H3K14ac_succ | Φ96 |
| H3K36me1_succ | Φ21 | H4K20me3_prec | Φ59 | H3K36ac | Φ97 |
| H3K4me3 | Φ22 | H4K20me3_succ | Φ60 | H3K36ac_prec | Φ98 |
| H3K4me3_prec | Φ23 | H2AK5ac | Φ61 | H3K36ac_succ | Φ99 |
| H3K4me3_succ | Φ24 | H2AK5ac_prec | Φ62 | H4K16ac | Φ100 |
| H3K9me1 | Φ25 | H2AK5ac_succ | Φ63 | H4K16ac_prec | Φ101 |
| H3K9me1_prec | Φ26 | H2BK20ac | Φ64 | H4K16ac_succ | Φ102 |
| H3K9me1_succ | Φ27 | H2BK20ac_prec | Φ65 | H2BK12ac | Φ103 |
| H3R2me2 | Φ28 | H2BK20ac_succ | Φ66 | H2BK12ac_prec | Φ104 |
| H3R2me2_prec | Φ29 | H3K23ac | Φ67 | H2BK12ac_succ | Φ105 |
| H3R2me2_succ | Φ30 | H3K23ac_prec | Φ68 | H3K18ac | Φ106 |
| H3K27me1 | Φ31 | H3K23ac_succ | Φ69 | H3K18ac_prec | Φ107 |
| H3K27me1_prec | Φ32 | H3K9ac | Φ70 | H3K18ac_succ | Φ108 |
| H3K27me1_succ | Φ33 | H3K9ac_prec | Φ71 | H3K4ac | Φ109 |
| H3K36me3 | Φ34 | H3K9ac_succ | Φ72 | H3K4ac_prec | Φ110 |
| H3K36me3_prec | Φ35 | H4K8ac | Φ73 | H3K4ac_succ | Φ111 |
| H3K36me3_succ | Φ36 | H4K8ac_prec | Φ74 | H4K5ac | Φ112 |
| H3K79me1 | Φ37 | H4K8ac_succ | Φ75 | H4K5ac_prec | Φ113 |
| H3K79me1_prec | Φ38 | H2AK9ac | Φ76 | H4K5ac_succ | Φ114 |
